# Supplementary material
Source: publisher figshare collection journal article supplement (https://geolsoc.figshare.com/ndownloader/files/25778057)

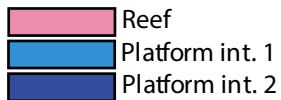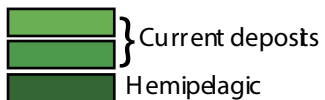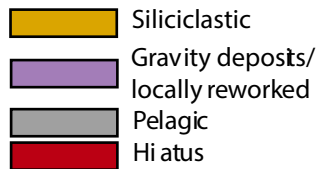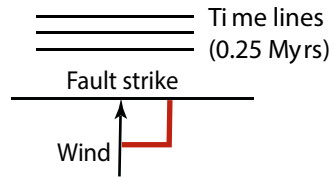

## Model Run 5: fault nucleation

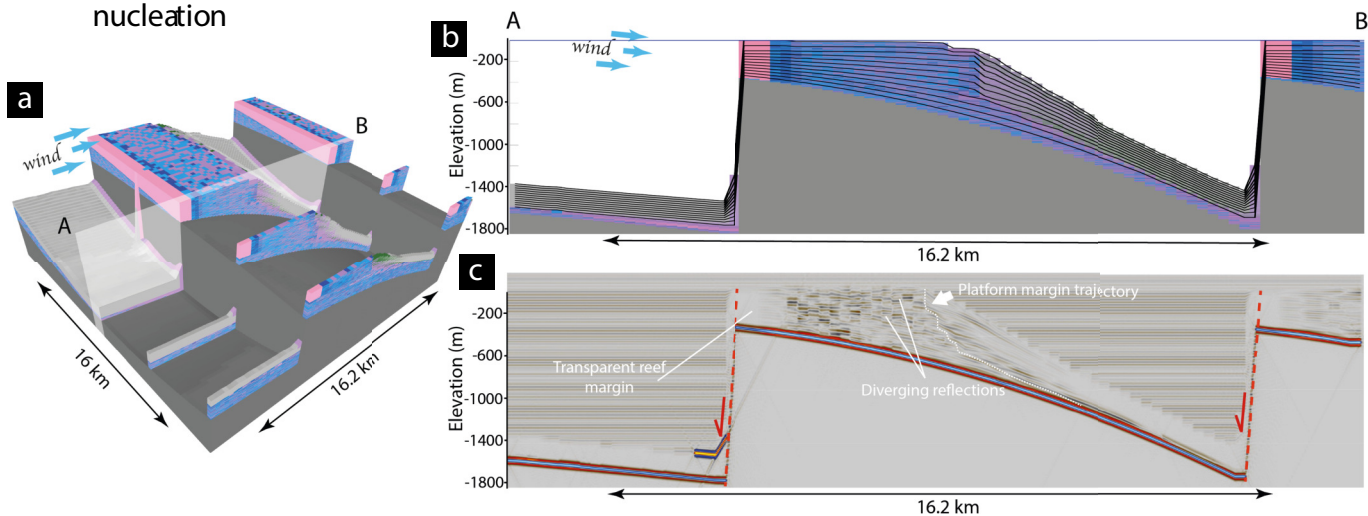

Supplement: Supplementary file 1 [file 25778057]
